# Supplementary material for: Fluorescent reporter assays provide direct, accurate, quantitative measurements of MGMT status in human cells
Source: PubMed Central journal article supplement (PMC6392231; doi:10.1371/journal.pone.0208341), 2019-02-27

**A**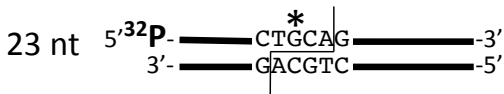

Repair incubation  
 ↓  
 PstI digest

↓  
 Denaturing PAGE

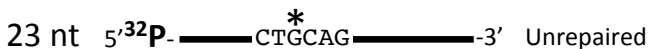**OR**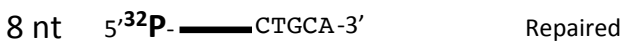**B**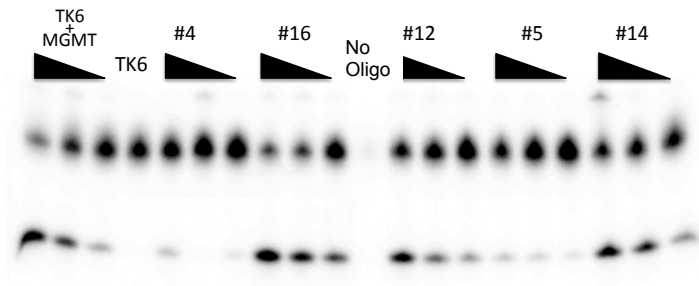**C**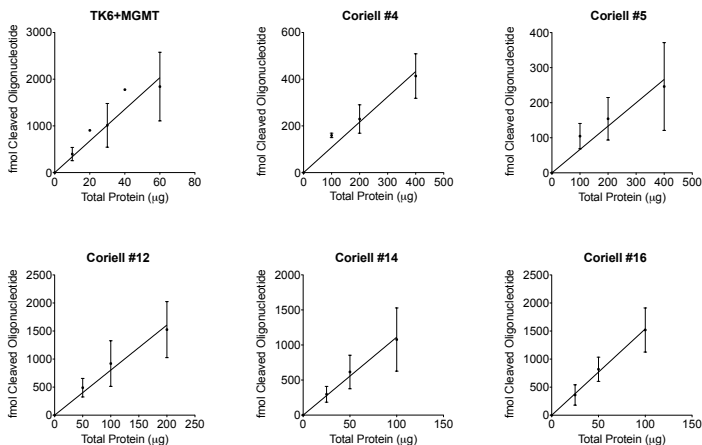

Supplement: pone.0208341.s001.pdf [file pone.0208341.s001.pdf]
