# Supplementary material for: Fluorescent reporter assays provide direct, accurate, quantitative measurements of MGMT status in human cells
Source: PubMed Central journal article supplement (PMC6392231; doi:10.1371/journal.pone.0208341), 2019-02-27

# Coriell

**TK6**

**#4**

**#5**

**#12**

**#14**

**#16**

**3080**

**5199**

**U M**

100bp →

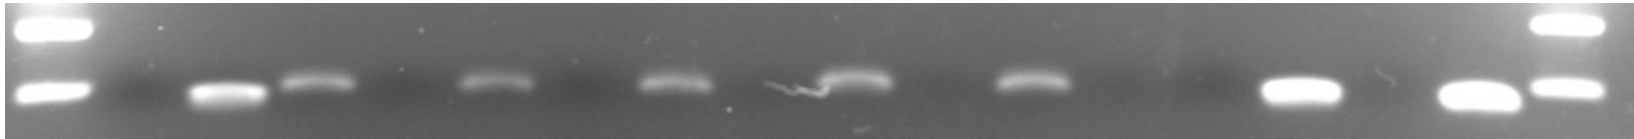

Supplement: pone.0208341.s003.pdf [file pone.0208341.s003.pdf]
